# Supplementary material for: Racial/ethnic disparities in renal cell carcinoma: Increased risk of early‐onset and variation in histologic subtypes
Source: PubMed Central journal article supplement (PMC6826053; doi:10.1002/cam4.2552), 2019-09-11
Supplement: CAM4-8-6780-s001.pdf [file CAM4-8-6780-s001.pdf]

## Supplementary Tables

**Supplementary Table 1** Variation in age and other variables across racial/ethnic groups in National Cancer Database.

|                                        | NHW (n=302230) | HA (n=49308)   | AI/AN (n=1811) | NHB (n=45334)  | AA (n=6390)    | <i>P</i> <sup>1</sup> |
|----------------------------------------|----------------|----------------|----------------|----------------|----------------|-----------------------|
| Age, mean (SD)                         | 63.2 (12.7)    | 60.4 (13.4)*** | 58.5 (12.1)*** | 60.4 (12.4)*** | 61.4 (13.6)*** | <0.001                |
| Gender, n (%)                          |                |                |                |                |                | <0.001                |
| Male                                   | 190841 (63.1)  | 29785 (60.4)   | 1039 (57.4)    | 26776 (59.1)   | 4175 (65.3)    |                       |
| Female                                 | 111389 (36.9)  | 19523 (39.6)   | 772 (42.6)     | 18558 (40.9)   | 2215 (34.7)    |                       |
| Facility Type                          |                |                |                |                |                | <0.001                |
| Community Cancer Program               | 22422 (7.7)    | 3225 (7.0)     | 214 (12.6)     | 2431 (5.6)     | 498 (8.3)      |                       |
| Comprehensive Community Cancer Program | 120988 (41.6)  | 18735 (40.6)   | 774 (45.5)     | 13426 (31.2)   | 1825 (30.5)    |                       |
| Academic/Research Program              | 1116252 (40.0) | 19123 (41.5)   | 607 (35.7)     | 21071 (49.0)   | 3213 (53.8)    |                       |
| Integrated Network Cancer Program      | 30934 (10.6)   | 5040 (10.9)    | 105 (6.2)      | 6110 (14.2)    | 411 (7.4)      |                       |
| Insurance Type, n (%)                  |                |                |                |                |                | <0.001                |
| Private                                | 134449 (44.5)  | 20979 (42.5)   | 559 (30.9)     | 16475 (36.3)   | 2998 (46.9)    |                       |
| Public                                 | 153703 (50.9)  | 23368 (47.4)   | 1113 (61.5)    | 25661 (56.6)   | 3049 (47.7)    |                       |
| Not insured                            | 7385 (2.4)     | 3300 (6.7)     | 65 (3.6)       | 2167 (4.8)     | 245 (3.8)      |                       |
| Unknown                                | 66693 (2.2)    | 1661 (3.4)     | 74 (4.1)       | 1031 (2.3)     | 98 (1.5)       |                       |
| Charlson/Deyo Score                    |                |                |                |                |                | <0.001                |
| 0                                      | 212542 (70.3)  | 34588 (70.1)   | 1139 (62.9)    | 29083 (64.2)   | 4685 (73.3)    |                       |
| 1                                      | 65625 (21.7)   | 10857 (22.0)   | 469 (25.9)     | 10723 (23.7)   | 1281 (20.0)    |                       |
| 2                                      | 24063 (8.0)    | 3863 (7.8)     | 203 (11.2)     | 5528 (12.2)    | 424 (6.6)      |                       |
| TNM Stage, n (%)                       |                |                |                |                |                | <0.001                |
| I                                      | 176478 (63.3)  | 28277 (69.1)   | 1017 (60.5)    | 28647 (63.3)   | 3722 (62.8)    |                       |
| II                                     | 24938 (8.9)    | 4282 (9.4)     | 136 (8.1)      | 4250 (10.3)    | 553 (9.3)      |                       |
| III                                    | 37598 (13.5)   | 6095 (13.4)    | 267 (15.9)     | 3619 (8.7)     | 761 (12.8)     |                       |
| IV                                     | 39727 (14.3)   | 6737 (14.8)    | 262 (15.6)     | 4940 (11.9)    | 895 (15.1)     |                       |

Independent sample T-test, \*\*\* *P*<0.001 comparing to NHWs.

<sup>1</sup> *P*-values are from ANOVA for age and Chi-Squared test for other variables

Abbreviation: Non-Hispanic White (NHW), American Indian and Alaska Native (AI/AN), Non-Hispanic Black (NHB), Asian American (AA), Hispanic American (HA)

**Supplementary Table 2** Variation in age and other variables across Hispanic subgroups in National Cancer Database

|                                        | NHW<br>(n=302230) | Mexican/ Chicano<br>(n=3745) | Puerto Rican<br>(n=866) | Cuban<br>(n=798) | South or Central America<br>(n=1464) | Dominican<br>(n=269) | <i>P</i> <sup>1</sup> |
|----------------------------------------|-------------------|------------------------------|-------------------------|------------------|--------------------------------------|----------------------|-----------------------|
| Age, mean (SD)                         | 63.2 (12.7)       | 59.0 (13.2)***               | 60.0 (13.2)***          | 63.6 (12.7)      | 58.3 (13.0)***                       | 60.4 (14.0)***       | <0.001                |
| Gender, n (%)                          |                   |                              |                         |                  |                                      |                      | <0.001                |
| Male                                   | 190841 (63.1)     | 2264 (60.5)                  | 505 (58.3)              | 518 (64.9)       | 875 (59.8)                           | 164 (61.0)           |                       |
| Female                                 | 111389 (36.9)     | 1481 (39.5)                  | 361 (41.7)              | 280 (35.1)       | 589 (40.2)                           | 105 (39.0)           |                       |
| Facility Type                          |                   |                              |                         |                  |                                      |                      | <0.001                |
| Community Cancer Program               | 22422 (7.7)       | 363 (10.5)                   | 65 (8.0)                | 15 (1.9)         | 105 (7.8)                            | 37 (14.9)            |                       |
| Comprehensive Community Cancer Program | 120988 (41.6)     | 1374 (39.7)                  | 187 (23.0)              | 169 (21.7)       | 289 (21.5)                           | 47 (19.0)            |                       |
| Academic/Research Program              | 1116252 (40.0)    | 1590 (46.0)                  | 490 (60.3)              | 180 (23.1)       | 714 (53.1)                           | 137 (55.2)           |                       |
| Integrated Network Cancer Program      | 30934 (10.6)      | 131 (3.8)                    | 71 (8.7)                | 416 (53.3)       | 236 (17.6)                           | 27 (10.9)            |                       |
| Insurance Type, n (%)                  |                   |                              |                         |                  |                                      |                      | <0.001                |
| Private                                | 134449 (44.5)     | 1269 (33.9)                  | 291 (33.6)              | 240 (30.1)       | 568 (38.8)                           | 85 (31.6)            |                       |
| Public                                 | 153703 (50.9)     | 1900 (50.7)                  | 535 (61.8)              | 462 (57.9)       | 647 (44.2)                           | 162 (60.2)           |                       |
| Not insured                            | 7385 (2.4)        | 459 (12.3)                   | 26 (3.0)                | 88 (11.0)        | 219 (15.0)                           | 19 (7.1)             |                       |
| Unknown                                | 66693 (2.2)       | 117 (3.1)                    | 14 (1.6)                | 8 (1.0)          | 30 (2.0)                             | 3 (1.1)              |                       |
| Charlson/Deyo Score                    |                   |                              |                         |                  |                                      |                      | <0.001                |
| 0                                      | 212542 (70.3)     | 2798 (74.7)                  | 537 (62.0)              | 581 (72.8)       | 1138 (77.7)                          | 180 (66.9)           |                       |
| 1                                      | 65625 (21.7)      | 697 (18.6)                   | 245 (28.3)              | 167 (20.9)       | 268 (18.3)                           | 61 (22.7)            |                       |
| 2                                      | 24063 (8.0)       | 250 (6.7)                    | 84 (9.7)                | 50 (6.3)         | 58 (4.0)                             | 28 (10.4)            |                       |
| TNM Stage, n (%)                       |                   |                              |                         |                  |                                      |                      | <0.001                |
| I                                      | 176478 (63.3)     | 1957 (56.2)                  | 535 (65.6)              | 432 (57.1)       | 848 (61.6)                           | 166 (64.1)           |                       |
| II                                     | 24938 (8.9)       | 338 (9.7)                    | 61 (7.5)                | 84 (11.1)        | 127 (9.2)                            | 22 (8.2)             |                       |
| III                                    | 37598 (13.5)      | 509 (14.6)                   | 99 (12.1)               | 107 (14.2)       | 193 (14.0)                           | 34 (13.1)            |                       |
| IV                                     | 39727 (14.3)      | 678 (19.5)                   | 120 (14.7)              | 133 (17.6)       | 209 (15.2)                           | 37 (14.3)            |                       |

Independent sample T-test, \*\*\* *P*<0.001 comparing to NHWs. Abbreviation: Non-Hispanic White (NHW)

<sup>1</sup> *P*-values are from ANOVA for age and Chi-Squared test for other variables

Abbreviation: Non-Hispanic White (NHW),

**Supplementary Table 3** Variation in age and other variables across racial/ethnic groups in Arizona Cancer Registry

|                            | NHW (n=6965) | HA (n=1740)    | AI (n=632)     | NHB (n=330)    | AA (n=84)    | <i>P</i> <sup>1</sup> |
|----------------------------|--------------|----------------|----------------|----------------|--------------|-----------------------|
| Age, mean (SD)             | 64.3 (12.6)  | 59.3 (13.2)*** | 58.9 (12.9)*** | 59.9 (13.3)*** | 61.2 (14.3)* | <0.001                |
| Gender, n (%)              |              |                |                |                |              | 0.007                 |
| Male                       | 4525 (65.0)  | 1053 (60.5)    | 401 (63.4)     | 221 (67.0)     | 57 (67.9)    |                       |
| Female                     | 2440 (25.0)  | 688 (39.5)     | 231 (36.6)     | 109 (33.0)     | 27 (32.1)    |                       |
| Marital Status             |              |                |                |                |              | <0.001                |
| Married                    | 4362 (62.6)  | 985 (56.6)     | 283 (44.8)     | 175 (53.0)     | 55 (65.5)    |                       |
| Single                     | 987 (14.2)   | 343 (19.7)     | 181 (28.6)     | 84 (25.5)      | 8 (9.5)      |                       |
| Separated/Divorced/Widowed | 1388 (19.9)  | 338 (19.4)     | 107 (16.9)     | 62 (18.8)      | 14 (16.7)    |                       |
| Unknown                    | 228 (3.3)    | 74 (4.3)       | 61 (9.7)       | 9 (2.7)        | 7 (8.3)      |                       |
| TNM Stage, n (%)           |              |                |                |                |              | 0.01                  |
| I                          | 3728 (65.7)  | 859 (63.4)     | 319 (61.7)     | 168 (65.9)     | 37 (60.7)    |                       |
| II                         | 446 (7.9)    | 100 (7.4)      | 35 (6.8)       | 32 (12.5)      | 3 (4.9)      |                       |
| III                        | 788 (13.9)   | 194 (14.3)     | 85 (16.4)      | 35 (13.7)      | 10 (16.4)    |                       |
| IV                         | 709 (12.5)   | 201 (14.8)     | 78 (15.1)      | 20 (7.8)       | 11 (18.0)    |                       |

Independent sample T-test, \* $P < 0.05$  and \*\*\*  $P < 0.001$  comparing to NHWs.

<sup>1</sup>  $P$ -values are from ANOVA for age and Chi-Squared test for other variables

Abbreviation: Non-Hispanic White (NHW), American Indian and Alaska Native (AI/AN), Non-Hispanic Black (NHB), Asian American (AA), Hispanic American (HA)

**Supplementary Table 4** Variation in age and other variables in Hispanic subgroups in Arizona Cancer Registry

|                            | NHW (n=6965) | Mexican (n=734) | <i>P</i> | US-Born Mexican (n=335) | Mexico-Born Mexican (n=238) | <i>P</i> |
|----------------------------|--------------|-----------------|----------|-------------------------|-----------------------------|----------|
| Age, mean (SD)             | 64.3 (12.6)  | 62.0 (13.2)     | <0.001   | 63.5 (13.5)             | 61.7 (12.3)**               | 0.004    |
| Gender, n (%)              |              |                 | 0.24     |                         |                             | 0.09     |
| Male                       | 4525 (65.0)  | 464 (62.8)      |          | 228 (68.1)              | 141 (59.2)                  |          |
| Female                     | 2440 (25.0)  | 275 (37.2)      |          | 107 (31.9)              | 97 (40.8)                   |          |
| Marital Status             |              |                 | <0.001   |                         |                             | <0.001   |
| Married                    | 4362 (62.6)  | 390 (52.8)      |          | 160 (47.8)              | 141 (59.2)                  |          |
| Single                     | 987 (14.2)   | 147 (19.9)      |          | 63 (18.8)               | 43 (18.1)                   |          |
| Separated/Divorced/Widowed | 1388 (19.9)  | 166 (22.5)      |          | 94 (28.1)               | 45 (18.9)                   |          |
| Unknown                    | 228 (3.3)    | 36 (4.9)        |          | 18 (5.4)                | 9 (3.8)                     |          |
| TNM Stage, n (%)           |              |                 | <0.001   |                         |                             | <0.001   |
| I                          | 3728 (65.7)  | 285 (48.5)      |          | 120 (44.8)              | 97 (49.7)                   |          |
| II                         | 446 (7.9)    | 41 (7.0)        |          | 17 (6.3)                | 11 (5.6)                    |          |
| III                        | 788 (13.9)   | 99 (16.8)       |          | 45 (16.8)               | 41 (21.0)                   |          |
| IV                         | 709 (12.5)   | 163 (27.7)      |          | 86 (32.1)               | 46 (23.6)                   |          |

Independent sample T-test, \*\*  $P < 0.01$  comparing to NHWs.

<sup>1</sup> *P*-values are from Independent sample T-test for age and Chi-Squared test for other variables

<sup>2</sup> *P*-values are from ANOVA for age and Chi-Squared test for other variables

Abbreviation: Non-Hispanic White (NHW), American Indian and Alaska Native (AI/AN), Non-Hispanic Black (NHB), Asian American (AA), Hispanic American (HA)
